# Supplementary material for: The Impacts of Climatic Factors and Vegetation on Hemorrhagic Fever with Renal Syndrome Transmission in China: A Study of 109 Counties
Source: Int J Environ Res Public Health. 2019 Sep 16;16(18):3434. doi: 10.3390/ijerph16183434 (PMC6765884; doi:10.3390/ijerph16183434)
Supplement: Supplementary file 1 [file ijerph-16-03434-s001.zip › 0916 HFRS SI-Table S1.xlsx]

## Sheet: Sheet1
No.	Longitude	Latitude	Tmean(℃)							Rain(mm)							Relative humidity(%)							NDVI
			Mean	SD	Min	0.25	0.5	0.75	Max	Mean	SD	Min	0.25	0.5	0.75	Max	Mean	SD	Min	0.25	0.5	0.75	Max	Mean	SD	Min	0.25	0.5	0.75	Max
1	114.443	38.5362	12.7241	10.4816	-5.51837	3.47568	14.0721	22.2624	27.6525	44.0654	50.2376	0.000655404	3.53635	19.9865	72.8448	189.564	61.9286	12.0635	28.0188	53.0782	62.599	71.5255	84.0011	126.758	48.0468	47.9562	85.0736	124.257	161.195	213.774
2	118.575	39.7835	11.6418	10.9114	-7.05414	1.58865	13.1494	21.3399	26.5461	50.9022	63.5529	0.0008	4.881	21.0373	77.4524	308.29	60.4987	11.1861	37.3077	51.8129	59.3516	70.1744	80.5442	114.446	55.5265	49.6391	67.308	89.2746	169.987	219.652
3	118.55	39.3957	11.6582	10.7979	-6.92882	2.14025	13.2373	21.5319	26.5711	49.95	62.017	0.0051	4.42837	21.6945	77.0225	290.317	63.2905	9.69241	42.5498	56.2045	62.2238	71.0067	81.2968	115.847	51.8521	53.4459	68.6955	94.418	163.584	219.24
4	118.931	39.3536	11.747	10.5486	-6.12963	2.28592	13.0145	21.7279	26.4569	50.1482	61.6525	0.0056	5.1969	21.1196	80.0562	266.987	63.6957	9.51662	43.7209	56.2483	62.6041	71.6605	82.1672	112.472	48.5969	49.4113	66.7044	94.4778	152.45	203.942
5	118.675	40.0317	11.2292	11.0886	-7.92068	0.80658	12.5792	21.1276	26.4036	50.9455	63.2778	0.0003	4.64135	21.6022	81.3406	306.201	59.3471	11.8281	33.1063	49.203	58.4271	69.468	80.2971	114.163	50.9251	53.7443	68.4385	92.8109	165.751	204.759
6	119.6	39.93	10.4137	10.8639	-8.61868	0.758174	11.6837	20.3908	25.5333	50.9164	61.5382	0.0008	5.60553	22.4389	89.0507	269.245	64.3128	10.7631	45.2186	55.7444	61.764	73.636	85.5683	99.3327	42.9882	43.6615	60.9858	81.8327	142.875	180.563
7	119.124	40.3454	10.0332	11.3345	-9.41933	-0.309599	11.387	20.2839	25.7858	49.5217	60.1257	0.0088	4.3774	21.9294	80.7892	284.559	59.2805	12.0544	32.6571	49.2364	58.5351	69.0257	81.4741	143.992	57.1807	70.5004	86.3527	130.554	203.831	232.254
8	119.089	39.6327	11.7248	10.622	-6.62637	2.26043	13.1371	21.6403	26.4782	51.6475	63.8269	0.0046	5.15207	21.5156	82.2422	275.159	61.9725	10.8346	41.7505	53.3737	60.1815	71.2008	82.6731	117.235	52.3241	53.5153	68.2646	97.2167	167.511	215.11
9	119.386	40.007	10.791	10.9268	-8.02265	1.04159	12.2994	20.7854	25.8185	51.147	62.7494	0.0124	5.46342	21.4153	89.121	275.375	61.8401	11.3489	40.5562	52.9153	59.0378	71.7984	83.3367	133.077	55.8425	64.856	79.8752	115.501	194.655	228.631
10	118.975	39.9115	11.4143	10.8953	-7.30377	1.33156	13.0133	21.2092	26.2589	51.4762	64.3444	0.0033	5.11977	20.2546	81.1607	298.676	60.0738	11.7848	38.0079	50.4673	58.071	70.4065	82.0509	120.245	59.4147	56.02	67.9869	89.4768	186.889	225.642
11	124.456	49.0918	1.46481	15.7702	-26.6379	-13.3392	4.03517	15.53	22.869	40.858	51.2098	0.189	4.88675	15.6838	66.422	240.309	63.3005	10.422	30.7023	57.9389	63.8768	71.2469	81.4213	117.763	70.5288	31.9303	49.8348	95.6818	192.977	239.404
12	123.798	50.328	-0.665175	15.5914	-28.1876	-15.6219	1.64264	13.4339	20.6403	40.4224	48.5093	0.3828	6.07575	16.1699	61.5461	256.772	64.8243	9.63204	36.9856	58.4038	65.6859	72.4486	81.9003	131.727	74.3181	37.2086	58.2955	108.559	213.633	243.596
13	123.328	40.3967	8.59711	11.71	-12.7852	-1.50438	10.1011	19.354	24.5589	67.0931	75.3737	0.002	13.2267	43.922	96.0188	425.008	67.8798	10.1197	49.2071	59.8138	65.936	75.8756	88.488	147.316	64.5645	51.7768	85.9302	129.453	215.801	238.919
14	122.778	40.8317	9.57622	12.0543	-12.6935	-0.77474	11.4215	20.2201	25.4986	59.903	66.4697	0.0043	11.5936	35.7644	93.9516	370.676	63.9195	10.346	42.2106	55.6605	63.3034	70.8561	85.9004	127.679	60.5105	42.7841	73.5224	104.992	196.106	225.329
15	124.812	41.6264	6.35926	12.9179	-17.8897	-4.06227	8.15384	17.4822	24.3567	71.8021	79.5212	0.2742	15.7915	44.4606	94.6272	449.966	69.8679	8.47219	50.8904	63.4671	69.5213	75.7594	87.2154	147.721	72.782	46.9869	77.9931	131.102	224.425	246.396
16	124.909	42.109	6.11304	13.214	-18.928	-4.63047	7.92956	17.6714	24.3271	66.1743	73.3434	0.0166	13.8215	42.0356	94.7835	374.045	69.3947	8.56118	49.0312	63.6163	69.5333	75.455	86.4475	145.711	72.6782	45.4272	79.8236	132.666	221.941	244.656
17	124.164	41.1981	7.4754	12.3801	-15.7775	-2.59846	9.17679	18.5358	24.5368	71.9439	78.0016	0.2671	17.0114	43.7561	92.7886	468.038	68.2172	9.08423	50.269	61.3756	67.8997	74.7611	86.8119	149.704	71.2989	48.52	79.907	136.548	223.41	243.118
18	124.913	40.7596	7.6868	11.857	-14.3976	-2.51701	9.25066	18.2341	23.7242	79.2471	85.7753	0.9817	18.9915	52.313	106.958	473.201	70.2958	9.06129	53.8648	63.1145	69.3525	77.3281	88.772	152.046	68.2102	48.8955	87.7848	146.44	222.765	241.35
19	124.053	40.57	8.03087	11.7323	-13.5734	-1.74148	9.37001	18.6886	24.1294	74.5345	82.1153	0.4733	15.6656	49.77	101.614	469.11	69.9447	9.56805	52.8156	62.4065	68.1784	77.1991	88.2214	149.737	65.9945	48.3493	87.1001	138.569	218.348	239.17
20	121.15	41.12	10.0722	11.5012	-9.49709	-0.198035	11.7574	20.882	25.5577	46.7436	55.6576	0.0083	3.66052	25.3172	71.6556	242.926	58.378	13.0582	31.9584	47.3947	56.7439	68.1904	84.5108	94.4887	41.5437	41.3469	57.5515	74.9082	134.511	171.347
21	121.27	41.1512	9.62187	11.6701	-10.2924	-0.681267	11.3572	20.5477	25.5169	47.4203	55.4733	0.0029	5.00357	24.0722	75.1103	246.829	60.2283	12.2345	37.2817	51.1374	57.9254	69.549	84.6676	120.252	60.4645	50.0408	68.0224	86.0195	188.12	229.653
22	120.87	40.77	9.68771	11.5442	-10.9865	-0.516874	11.3594	20.4173	25.4315	46.3585	55.6359	0.0034	4.01405	23.7214	73.1095	239.676	59.8392	12.7182	36.037	49.2866	56.9455	69.3668	84.7813	127.863	57.1287	66.1442	76.0191	99.3368	191.003	227.603
23	120.016	40.2957	9.9093	11.1665	-9.53159	0.062933	11.4863	20.3955	25.3192	49.8885	60.3737	0.0095	4.95348	21.9712	82.879	276.705	62.4943	11.6003	40.105	54.1753	59.3085	71.8698	85.1245	131.548	55.6343	66.8021	78.4983	113.683	192.075	229.157
24	120.463	40.5897	9.61074	11.3804	-10.9843	-0.273404	11.2463	20.3051	25.2706	48.1221	58.3692	0.0026	4.23651	24.5641	77.6778	275.658	62.3188	11.9267	39.8894	53.1339	58.6886	72.0026	86.3231	124.823	57.1394	64.0275	73.8205	95.5207	184.739	228.166
25	125.695	43.5832	5.64083	13.7521	-19.8446	-5.75484	7.93928	17.8779	24.2231	55.2624	63.5439	0.0463	9.59747	29.1547	80.2753	357.225	66.0536	9.76033	43.0617	59.1506	67.301	72.7342	84.5527	120.056	71.4894	34.4646	67.5486	88.4929	203.999	246.462
26	126.588	44.8674	4.8997	14.3852	-22.1015	-7.61392	7.25044	17.6113	24.0846	48.6759	52.4585	0.022826	9.74115	26.861	75.8601	213.97	65.5886	10.102	40.3221	59.0528	67.3097	72.9527	84.1875	118.326	74.5778	30.4671	65.8612	80.0366	204.689	246.962
27	126.16	43.0467	5.08584	13.867	-21.1734	-6.17573	7.37479	17.3565	23.9817	60.562	66.6319	0.1297	12.0017	33.8591	85.8646	364.934	68.6354	8.48012	48.4367	63.7261	69.5111	74.3953	85.6005	130.365	74.3385	38.4012	62.3427	106.87	213.978	248.725
28	125.258	43.3367	5.8939	13.6614	-19.4054	-5.51255	8.08404	18.0781	24.2546	53.654	61.735	0.0201	8.8567	30.8521	79.3056	327.049	65.3866	9.90385	42.3085	58.6116	66.7659	71.6696	85.0893	123.481	70.8583	34.8348	70.3919	92.2388	206.484	245.651
29	124.674	43.782	6.3893	13.7247	-19.43	-5.63173	8.6339	18.6157	24.384	45.8559	52.4266	0.0579	6.36985	25.2543	63.7903	244.138	60.9861	11.0023	37.7547	52.7099	62.858	68.4701	82.6602	119.009	70.1292	32.3557	68.6153	78.6363	198.524	240.756
30	125.706	42.5285	5.4769	13.4781	-19.4409	-5.45337	7.68427	17.3527	23.9795	62.9975	70.5523	0.0468	14.0352	36.0952	91.8617	351.691	68.8242	8.50651	50.1676	64.2512	69.6788	74.6664	85.7399	122.326	71.5752	35.7005	66.9519	95.844	206.121	243.546
31	127.612	42.2705	3.75622	12.2373	-19.4965	-6.88261	5.48893	14.8966	21.6299	66.2516	68.8126	2.1304	16.6887	41.2634	89.1373	345.594	65.8239	10.4588	45.2756	58.3498	64.0243	74.5041	86.061	149.762	68.9202	59.2134	75.9466	133.852	225.845	248.474
32	128.222	43.5519	4.06698	13.3795	-19.6916	-7.83573	6.16941	15.7305	21.9968	53.4233	54.3875	0.2902	10.9237	33.3252	77.9949	235.362	67.298	8.23176	48.8309	61.2144	66.8541	73.4675	84.289	148.008	69.5431	55.8303	77.2372	129.986	225.805	248.9
33	130.644	43.0661	6.13771	11.749	-14.004	-4.91439	8.18632	16.698	23.2162	48.7661	49.6188	0.0535251	10.2035	31.64	76.8594	240.691	65.0652	10.4189	44.5066	57.6544	63.4455	74.2446	85.629	154.703	69.0777	50.4416	87.8734	134.989	229.59	247.969
34	129.947	43.5328	4.34474	13.0468	-19.2725	-7.4791	6.32972	15.5851	22.048	46.3865	47.7332	0.0793	9.12411	28.7796	69.6707	232.121	66.3087	8.72915	47.8153	60.1117	65.0596	73.3295	84.3731	153.155	68.1895	63.6458	85.4426	130.996	231.054	249.551
35	128.424	42.6886	4.01448	12.1221	-17.9613	-6.69654	5.644	15.0565	21.1107	56.8183	60.9596	0.7947	11.4724	33.5444	79.6778	286.408	65.0666	10.6017	45.0714	57.5179	62.6262	74.1375	86.5707	151.805	68.0783	63.568	80.3476	132.733	225.928	249.618
36	125.062	48.4694	2.2847	15.8607	-26.3115	-12.0882	5.03106	16.3705	23.9395	40.9698	53.6616	0.1824	5.3224	15.0906	62.1555	251.739	64.1674	10.5202	31.4568	58.1971	65.6001	71.6213	82.1725	109.101	70.6921	28.6106	39.9062	86.3819	179.614	239.83
37	133.099	45.9851	3.90432	14.2205	-21.2497	-9.46068	6.13013	16.5881	23.4253	47.7322	43.0716	0.2726	15.6402	32.0885	68.2347	205.837	69.6235	8.06008	47.5305	64.5093	69.2202	75.0689	89.0799	125.789	75.4173	32.3088	51.3497	101.76	211.63	242.409
38	132.16	45.4594	4.2965	13.7316	-19.1398	-8.4964	6.2344	16.5083	22.8058	46.3415	43.8294	0.1096	11.8174	30.1579	69.7854	207.407	67.7944	8.96545	45.978	61.9899	67.7274	74.1278	88.888	106.808	60.9274	30.7509	52.9807	84.9211	169.685	208.445
39	130.742	47.737	2.7966	14.9867	-23.0661	-11.0157	4.94625	16.1472	23.5234	47.6735	52.4296	0.212	8.47663	25.8747	73.6334	205.734	68.0775	9.1492	41.9864	62.9024	68.2093	74.4157	85.9933	129.695	72.2253	38.9743	56.5189	107.222	213.363	240.056
40	131.131	46.8106	4.2721	14.5084	-20.5201	-8.94261	6.36268	17.295	24.312	45.7665	48.4688	0.0329	10.0535	26.9498	66.1577	208.622	66.289	9.28809	39.067	61.2425	65.6465	72.7236	87.0943	118.316	74.8146	31.9676	54.1715	89.4834	206.473	243.371
41	131.82	46.7586	4.18835	14.4346	-20.4757	-9.07924	6.35225	16.893	24.2705	44.9042	46.0356	0.1472	10.9707	28.6053	65.2612	202.344	66.7789	9.20416	40.3819	61.5162	66.6936	72.8778	87.1593	116.154	74.3945	28.7538	48.2415	87.8753	198.18	240.604
42	132.389	46.3986	4.22959	14.2434	-20.8024	-8.86806	6.4235	16.5857	23.9276	45.1943	44.0896	0.2099	12.8928	27.4853	63.4194	203.135	67.1919	8.98946	41.8725	61.4144	67.2609	72.6146	87.619	126.138	75.1946	33.9492	52.7636	101.816	208.126	245.796
43	133.71	47.0621	3.18119	14.8197	-23.1305	-10.7189	5.6979	15.9641	23.9269	45.922	43.1806	0.6041	13.474	29.1678	63.5981	195.73	70.0667	7.72273	48.2073	65.7359	69.7121	75.1733	87.5475	128.925	77.5365	33.6342	45.996	107.003	216.988	246.338
44	130.32	46.8	3.88317	14.5952	-21.6786	-9.37887	5.80954	17.3141	23.6292	47.348	50.8628	0.0079	9.26615	28.928	65.4456	214.727	67.5933	9.27243	39.2613	62.9303	67.3178	73.3234	88.5757	116.274	70.3168	33.8859	49.7689	94.3253	191.273	236.502
45	130.621	46.2993	4.21164	14.2308	-20.1411	-8.64067	6.26937	17.1575	23.6488	45.3281	47.8379	0.0418	11.468	26.4605	63.384	203.281	66.991	9.21727	38.1325	61.345	66.429	73.1054	87.5737	125.292	72.1859	38.2411	54.7889	101.87	203.701	244.505
46	130.859	46.9356	3.82942	14.743	-21.2169	-9.88399	5.92957	17.1713	24.054	45.6922	49.7282	0.0449	10.2648	23.4599	67.4847	212.673	67.7021	8.89477	41.6902	63.3808	66.9934	73.2605	87.7666	112.374	72.1522	30.3899	48.0787	87.2306	193.693	237.916
47	133.246	47.8025	3.03411	15.1406	-22.9845	-11.4487	5.60499	16.1737	24.4079	44.9568	45.4524	0.6056	10.633	27.5001	67.8798	204.543	70.0405	7.88136	46.2473	66.1957	69.8326	75.1217	86.9134	114.195	72.7254	27.5695	38.8905	90.843	187.315	240.344
48	132.52	47.1625	3.39093	14.8568	-21.996	-10.902	5.683	16.265	24.1197	44.6331	45.2407	0.4682	10.3993	28.0478	62.117	204.618	69.3681	8.33023	45.0379	65.0411	69.4492	74.7961	87.0906	113.334	73.902	27.9971	40.0805	88.8773	195.695	243.77
49	130.007	45.3819	4.17292	14.0298	-19.9733	-8.76919	6.18542	16.6412	23.2038	44.7826	47.1781	0.0223028	9.456	26.8422	63.8175	187.97	67.3374	8.89576	42.5349	60.6527	67.1303	73.7935	85.8955	135.116	69.2326	44.6729	73.3072	112.883	208.275	242.663
50	129.203	44.8879	4.03854	14.0848	-20.5904	-8.87429	6.03993	16.3694	22.9558	46.2538	47.503	0.0711	9.5798	26.5554	70.4544	197.212	68.3092	8.54868	47.2341	62.0388	68.5435	74.6885	84.7391	149.061	69.0321	58.171	82.2009	130.933	226.552	246.667
51	129.198	44.0462	4.06392	13.7583	-20.4479	-7.99873	6.24566	16.0043	22.3903	46.7648	47.5879	0.0838	8.40878	29.3492	71.4929	213.081	67.0687	8.44731	47.0011	61.0596	66.5092	73.2997	83.7579	139.535	69.2283	50.6862	71.412	115.815	214.579	245.771
52	125.751	49.5977	0.892665	16.053	-28.3268	-14.0288	3.58963	15.0525	22.8152	42.6919	52.186	0.4285	6.24005	18.236	66.3587	236.06	65.1687	10.133	33.6923	59.4172	66.2469	72.185	83.3681	119.657	74.3478	31.9981	42.3356	99.2053	202.33	240.435
53	128.354	48.8672	0.877929	15.7833	-27.49	-13.374	3.40204	14.8295	22.3863	47.7252	54.7659	0.3611	10.1137	22.2277	68.1642	227.573	68.8129	8.79763	40.2907	63.1242	68.9252	75.6399	85.4494	134.168	74.9981	41.8826	55.9896	113.375	221.488	242.539
54	127.097	48.1071	1.63966	15.7711	-26.5238	-13.128	4.27714	15.5945	23.4815	47.1136	57.6951	0.2804	8.34727	21.3756	62.2488	271.313	68.0037	9.43953	35.8359	62.5954	68.9001	74.9582	84.3603	124.575	74.4507	34.5759	44.6482	102.278	203.434	245.033
55	126.616	48.7364	1.03022	16.1782	-28.981	-13.8915	3.88508	15.3693	23.3299	44.831	55.1026	0.3866	7.3579	20.0828	63.5552	252.422	67.6824	9.47472	35.5948	62.0789	69.172	74.68	84.7635	120.811	74.3776	32.5353	40.3528	99.0088	202.979	238.545
56	119.381	34.4005	14.547	9.1417	-1.84278	6.11665	15.7408	22.7919	28.7573	78.6154	91.2203	0.0019	17.3796	39.2674	107.194	524.109	71.3371	7.98441	48.8368	66.316	70.9666	77.3241	89.4925	148.226	43.0953	71.4752	111.978	146.645	192.146	219.814
57	120.269	29.693	17.555	8.63086	1.05905	9.90397	18.2957	25.097	32.0021	117.148	72.5082	6.1063	64.9845	106.945	159.748	496.145	72.7475	5.45115	55.472	68.9181	72.7569	76.9666	83.4727	172.279	30.645	107.356	144.394	178.847	200.631	218.976
58	118.32	29.1853	17.3724	8.22362	2.08207	10.4533	17.785	24.9341	30.1791	141.263	105.58	6.2267	66.6098	113.075	183.012	704.84	77.0713	5.21062	59.9843	73.8984	77.4218	80.6266	86.8503	196.247	22.7457	112.413	177.767	201.516	215.479	229.931
59	120.972	29.1457	17.6795	8.16733	2.09681	10.3893	18.2492	25.0867	30.7785	121.858	78.1978	8.3947	57.9553	108.031	166.323	325.338	72.6806	4.70199	60.9772	69.4364	72.5513	76.2825	83.5948	183.834	26.1904	117.888	161.313	185.903	208.529	225.599
60	121.207	28.8512	18.0981	7.85095	3.11312	11.0554	18.6811	25.1964	30.7533	127.354	84.5079	9.6572	59.1611	107.308	174.153	352.314	73.7624	4.83557	62.1861	70.6029	73.7528	77.2644	84.3699	181.681	21.2042	115.204	165.079	185.196	200.34	217.029
61	119.13	28.08	18.2288	7.49626	3.70086	11.4735	18.757	25.3361	30.0097	141.552	97.1364	6.2915	72.6699	119.295	187.441	491.202	75.5478	4.58363	61.9594	72.801	75.8567	78.8122	84.2306	203.014	17.2756	161.347	188.786	206.033	218.565	230.035
62	114.92	28.23	18.3331	8.29816	2.34503	11.1397	19.1016	25.7726	31.3084	136.647	93.4636	3.4913	72.2648	116.616	182.13	429.455	76.9084	4.85966	65.0184	73.5001	77.3995	80.1696	88.8796	164.363	34.6347	47.4475	136.51	163.976	196.346	216.265
63	114.78	28.38	17.7747	8.25213	2.14947	10.6455	18.4206	25.3519	30.3236	137.366	95.0797	5.8229	66.9004	112.921	176.183	444.943	78.5052	4.89295	65.6307	75.1994	78.6388	82.2098	89.9791	187.717	28.5286	49.9973	167.274	190.135	211.87	226.215
64	115.37	28.42	18.4891	8.4017	2.49143	11.1679	19.4924	26.0395	31.724	136.459	98.1713	2.8622	64.9245	113.352	178.322	454.118	74.9354	5.05977	61.276	71.5203	74.7829	78.8231	88.2168	157.138	33.9846	65.6333	130.84	148.815	192.715	211.232
65	117.468	36.7334	13.7765	10.1199	-4.5513	5.36331	15.0571	23.0273	27.9819	58.9676	73.2758	0.0001	8.9648	27.4947	91.3728	397.431	60.1972	11.9565	32.091	51.1251	59.5114	68.9079	84.5389	135.609	41.9299	57.3673	103.499	127.826	174.209	213.665
66	119.95	36.2388	13.2008	9.63272	-4.31784	4.60543	14.2566	22.0875	27.7454	60.0505	71.3527	0.0094	11.2643	30.3011	70.5015	347.635	67.1819	8.95315	47.7726	60.4143	65.853	74.762	85.4805	130.684	38.7007	65.1885	99.4431	127.641	162.59	212.924
67	119.943	36.7825	12.9828	9.98433	-5.13962	4.22796	14.1007	22.1405	27.8915	55.687	68.0861	0.0628	9.28021	30.5643	65.525	319.19	66.6636	8.40312	45.7768	60.9985	66.1132	72.0323	84.7295	133.414	43.9604	66.9005	95.6772	126.362	175.181	226.391
68	119.867	35.859	13.3571	9.35696	-3.74721	4.85429	14.3751	21.956	27.7932	65.7122	75.5669	0.0216	12.7143	32.8436	87.9863	343.451	68.0989	9.37831	44.664	61.2235	66.79	75.198	87.009	127.076	43.1856	68.3091	90.4038	116.785	154.988	220.118
69	118.049	36.813	13.9124	10.0948	-4.70274	5.50486	15.1741	23.1489	28.067	59.5331	73.0521	0	9.73122	28.1769	82.5426	380.903	60.3167	11.3581	35.2702	51.4141	59.2752	68.7265	84.341	120.132	44.3461	57.039	78.1569	114.284	159.106	202.971
70	118.176	36.1255	13.1459	9.95926	-4.92678	4.6357	14.2678	22.5162	27.7223	63.1013	77.8109	0.0004	10.204	27.9173	86.7699	331.94	62.3021	11.0314	39.7354	53.4925	61.6033	69.5749	84.3413	128.785	49.7224	50.6747	81.2443	115.284	172.957	216.698
71	118.556	36.3557	13.118	10.0362	-5.15715	4.50015	14.0216	22.5092	27.7691	59.2456	71.31	0.0005	10.4305	28.381	80.3572	317.268	63.2607	10.6952	40.0551	55.0973	62.6078	71.832	84.8861	129.966	47.6642	52.2793	85.2323	127.874	172.485	214.693
72	118.463	36.6714	13.5991	10.1509	-5.13363	4.96981	14.7444	22.9525	28.0671	55.9514	67.8814	0.0007	9.99718	28.7291	74.0394	358.692	61.7698	10.9758	38.1133	54.0222	60.7732	70.5248	84.5169	132.412	39.8308	63.236	95.4011	130.768	166.192	202.318
73	119.404	36.0113	13.2153	9.67521	-4.51185	4.72622	14.5768	21.7567	27.6744	61.9874	71.8766	0.0087	11.9093	30.4277	81.3671	330.66	66.5365	9.7154	46.9507	59.5057	65.4014	73.6998	85.921	139.02	43.3515	66.0801	103.912	130.085	170.203	226.73
74	119.146	36.3287	13.0299	9.95815	-5.07253	4.27607	14.1088	22.0047	27.8238	58.3322	68.679	0.0233	10.1181	30.1697	78.0607	316.36	65.8513	9.79829	43.9136	58.8544	65.3746	72.8955	84.8121	126.954	46.6124	44.9118	84.9897	121.287	165.712	217.63
75	119.694	36.381	13.2092	9.79672	-4.52947	4.65024	14.4533	22.1019	27.8129	57.4751	68.1923	0.0017	10.4315	31.2608	71.0529	331.017	66.407	9.08852	45.1474	59.7266	65.7113	72.5156	84.6537	142.637	43.333	69.786	106.719	135.249	180.052	226.285
76	119.45	35.42	13.6568	9.28128	-3.12918	5.173	14.717	22.1177	27.8778	69.9495	80.0044	0.0042	12.2822	35.4746	95.0847	340.354	67.6559	10.0504	40.8037	60.7103	66.643	75.5049	87.7293	125.051	41.9377	65.6581	90.9868	110.775	148.198	211.813
77	119.238	35.741	13.4008	9.56662	-4.0394	4.88613	14.839	21.7583	27.6754	65.6282	75.8505	0.005	12.0941	33.2439	90.0293	329.917	66.1031	10.3018	42.3046	58.5474	64.5369	74.0836	86.5454	127.704	47.2967	62.4405	87.6317	110.524	161.34	225.31
78	118.881	35.6509	13.2835	9.67181	-4.30657	4.69513	14.6364	21.5624	27.6027	66.9395	78.5473	0.0025	11.5201	34.2607	94.3535	327.565	66.7191	9.95113	42.047	59.6686	66.0847	73.7131	86.2852	128.18	47.1634	58.9279	89.2721	116.675	166.008	223.992
79	117.65	36.2	13.1972	9.91027	-4.90553	4.98277	14.4057	22.4106	27.4197	63.0521	78.6077	0	8.99293	28.1713	88.2909	376.841	60.2153	11.6158	35.9174	50.7893	58.9774	68.177	84.2842	121.925	43.4209	51.4243	82.5331	112.065	156.487	202.149
80	118.404	35.536	13.52	9.71943	-4.16326	5.03104	14.6703	21.886	27.806	68.8455	82.9544	0.0011	11.2163	31.872	93.2368	341.391	65.4037	10.3764	40.8887	57.6179	64.592	73.4624	85.512	131.59	45.2519	60.6082	93.4745	124.385	159.656	224.035
81	118.597	35.9093	13.1543	9.8246	-4.66784	4.54633	14.298	21.5974	27.5403	64.2687	76.9929	0.0014	11.0703	29.2416	93.3144	324.121	64.7422	10.6039	40.1232	56.451	64.0105	71.9841	84.9887	124.518	50.5812	45.0147	80.5567	105.278	162.354	224.261
82	117.986	34.8632	14.4038	9.53995	-3.15474	6.0544	15.448	22.5596	28.4399	74.0844	87.787	0.0001	14.0943	30.9931	104.753	346.584	67.0638	9.50179	43.2343	60.4041	66.2579	75.0198	86.5638	135.593	39.535	68.328	106.099	128.77	163.693	219.967
83	117.975	35.2535	14.1717	9.65253	-3.47243	5.69219	15.2811	22.7226	28.2925	71.0826	86.2772	0.0008	13.0731	31.1251	96.8509	330.198	64.9019	10.1577	42.4607	57.2634	64.2046	71.9534	85.2508	129.783	44.0241	61.68	92.3747	122.135	158.302	215.8
84	117.671	35.4326	14.329	9.68443	-3.42852	5.99599	15.5199	23.0432	28.3971	68.474	85.9569	0.0006	12.52	28.6394	87.1825	341.468	63.3854	10.759	38.3727	55.326	62.8259	71.1641	84.4842	126.315	47.2615	60.4635	82.2629	112.743	161.478	220.523
85	118.877	35.2128	13.8558	9.45112	-3.20815	5.48889	15.1422	22.0518	28.0788	72.695	84.2735	0	13.4294	34.2454	100.871	345.512	67.7996	9.72138	39.963	61.5603	67.2361	74.539	87.4832	131.559	46.2838	64.2762	95.6511	120.878	164.876	226.807
86	112.359	31.6716	16.2432	8.67387	0.278805	8.99924	17.236	24.4958	29.9364	76.6468	67.5245	0.2693	25.6133	56.6082	116.272	332.599	74.6233	6.34089	55.2306	71.1993	75.2146	79.0764	86.3344	158.123	34.6717	85.043	131.354	154.827	181.586	224.515
87	112.346	28.1308	17.5688	8.42698	1.57962	10.2143	18.0904	24.9889	31.9423	118.21	78.4732	6.40586	59.0157	103.765	164.212	338.762	76.3996	5.18	58.813	73.0237	76.7734	79.8559	89.6289	161.782	36.0748	76.5918	134.722	158.446	196.601	217.518
88	112.909	26.4208	18.5107	8.19779	2.06656	11.0992	19.3528	25.763	32.1296	115.746	79.0314	1.8833	56.6952	101.248	160.361	378.842	77.0401	5.88692	56.3141	73.5477	77.8568	80.862	90.9366	156.238	38.3092	48.3214	127.28	161.768	189.769	207.382
89	101.461	27.601	14.2019	4.65062	5.91612	10.055	14.8621	18.6117	21.1284	71.8599	77.9542	0.0272	2.63075	36.4723	133.682	259.37	59.3232	14.7395	27.5821	46.3159	61.542	73.1698	81.8231	166.12	20.3858	132.197	147.94	164.882	181.66	218.138
90	106.89	27.6606	15.3673	7.25585	-0.0287616	9.43494	15.7574	21.8633	27.1575	82.0023	61.4313	5.7297	31.7871	64.4191	126.136	278.797	78.4753	5.13743	62.7307	75.1091	79.2442	82.2662	88.0262	157.772	42.0574	43.0674	130.189	167.041	193.342	215.657
91	109.07	34.27	14.3944	9.44653	-2.88624	5.9134	15.4917	23.1762	28.4025	51.5021	52.4868	0.000728428	12.5307	33.848	74.8792	316.575	66.4447	10.4649	42.533	58.2715	66.8623	75.24	87.5613	119.285	30.5168	39.8965	98.2828	122.087	146.439	174.455
92	108.93	34.28	14.6008	9.39892	-2.59321	6.25462	15.8215	23.3927	28.4191	49.445	51.8276	0.000118357	12.0784	31.9496	75.1328	319.797	65.9281	10.6807	42.149	57.8142	66.4904	75.2048	87.0864	103.793	30.2856	40.307	80.1564	106.213	129.369	171.743
93	108.95	34.22	14.3848	9.42309	-2.73384	5.98743	15.4415	23.213	28.4763	53.1391	54.3634	0	12.6262	35.3383	75.8925	330.864	66.8462	10.3128	42.3051	59.1672	68.0237	75.516	87.5359	88.5251	23.1982	33.8876	72.3755	92.8679	106.878	131.253
94	109.287	34.5025	14.3002	9.48342	-3.09187	5.86879	15.372	23.0334	28.1004	48.9534	49.6036	0.000170238	11.2764	31.7078	74.7207	297.92	66.8564	10.3661	41.8193	58.2264	67.126	75.8734	87.9539	146.233	39.2719	59.2858	109.445	153.239	181.659	213.384
95	108.93	34.17	13.7295	9.21626	-3.07712	5.47642	14.5387	22.316	27.7897	57.2682	57.5833	0.000533138	13.3339	37.8648	81.6841	338.133	68.4589	9.48929	45.8284	60.9937	69.0701	76.4329	87.8867	152.988	38.0842	65.0628	127.037	155.186	187.164	216.13
96	109.411	34.0979	13.0794	9.29444	-4.14483	4.97303	13.6401	21.5329	27.102	55.6433	54.6105	0.0126	12.8887	38.812	82.0037	316.232	68.6142	9.1088	48.895	61.846	69.068	76.4329	87.7033	158.347	41.6494	72.3941	120.453	169.631	196.509	230.092
97	108.109	33.9522	13.4834	8.68951	-2.90732	5.73056	14.4833	21.7868	26.5599	59.4755	60.809	0.0234	12.02	42.1197	92.4975	347.688	70.2736	9.28838	48.5788	63.2016	70.8531	77.5493	89.2584	168.961	46.4655	79.9164	122.589	179.142	212.758	237.169
98	108.582	34.003	14.1647	8.97282	-2.35244	6.1226	15.1739	22.8591	27.5479	58.2077	59.3358	0.005	13.1801	39.3787	85.2649	347.995	68.6614	9.86511	45.7119	60.4923	69.2053	76.6787	88.8025	163.29	40.3915	82.6961	133.532	166.63	201.078	232.43
99	107.68	34.4088	12.4897	9.09863	-4.41523	4.5045	13.28	20.6201	26.1766	53.3754	56.8608	0.0124	9.72653	34.0108	84.8792	325.311	69.6852	9.3376	44.8416	62.9635	69.93	77.0623	87.6996	154.048	31.776	86.3356	135.5	157.072	179.585	211.679
100	107.913	34.4043	12.8731	9.20643	-4.13342	4.68932	13.7375	21.1419	26.4883	52.1967	56.262	0.000613713	10.3349	32.4288	79.9859	335.608	69.5154	9.41819	45.7664	62.937	69.8593	76.6224	87.9575	155.971	33.2473	89.4356	129.115	160.1	186.132	208.051
101	107.821	34.1424	13.0639	8.87163	-3.58875	5.22947	14.0387	21.323	26.276	56.4866	59.3877	0.0293	10.1167	37.5139	90.3034	347.635	70.187	9.24787	43.4911	63.1891	70.5966	77.3662	88.3843	158.505	43.6165	71.9214	122.634	169.541	200.88	223.482
102	108.214	34.5264	12.9338	9.25028	-4.30275	4.59632	13.8306	21.6233	26.451	49.8927	53.5552	0.00036744	11.0382	31.8185	80.9137	324.265	67.3563	10.6218	43.5116	59.332	67.578	75.1235	87.5677	141.368	28.2828	85.3193	120.263	143.375	162.994	194.355
103	108.469	34.5955	12.7866	9.28841	-4.51298	4.53611	13.8275	21.4426	26.4759	48.578	51.5175	0.0001	11.4005	30.4589	79.3768	310.887	67.3803	10.5879	41.8897	59.8093	67.3542	76.1368	87.1817	140.833	39.2701	65.9682	99.412	155.084	174.357	206.202
104	108.219	34.2932	13.6136	9.26209	-3.3541	5.56784	14.7414	21.971	27.262	52.1016	56.5347	0.00110626	10.6637	33.7495	80.7815	344.899	69.2397	9.5978	44.4788	61.7269	69.8501	76.0276	88.4771	159.831	39.1404	83.027	122.952	168.532	195.536	224.343
105	108.462	34.3074	13.8811	9.3542	-3.04406	5.71188	14.7166	22.4181	27.7454	51.5541	55.0771	0.0004	11.3165	34.2688	79.6491	338.454	69.1391	9.40801	45.2911	62.5125	69.178	76.0733	87.9954	152.262	37.7147	60.412	120.038	155.396	188.058	218.246
106	109.48	34.5	14.0408	9.47956	-3.42048	5.78815	15.1132	22.8948	27.5414	48.9587	49.4904	0.00244531	11.7343	31.3627	72.4783	290.721	67.5766	9.78428	44.0236	59.9594	68.2365	76.0984	88.0424	144.865	39.8252	62.7524	111.407	146.227	178.321	217.736
107	109.799	34.4101	12.0502	9.38145	-5.47705	3.99755	12.525	20.2468	25.9594	52.0919	51.1537	0.00921166	14.3938	34.5579	77.2498	300.424	69.1678	9.13058	48.0497	62.6763	69.0091	76.9641	88.204	157.984	43.5791	80.9142	118.219	166.952	199.674	228.279
108	110.017	34.797	14.1884	9.52367	-3.58224	5.8352	15.8941	23.4354	27.3651	46.0925	48.9279	6.95e-05	9.25843	27.8835	71.9146	279.285	64.5814	10.8504	41.461	56.4405	63.7869	74.701	86.2469	122.712	45.6053	50.96	82.5001	112.778	158.381	207.342
109	110.041	34.5332	11.8961	9.33469	-5.93183	3.81761	12.7564	20.4867	25.6019	51.0576	51.3509	0.00167854	13.9746	32.9191	79.103	297.642	67.0871	9.82243	44.6098	59.9562	66.8084	75.8889	87.5586	143.068	42.7552	60.9177	107.369	147.377	177.741	219.088
